1 **Estimated dietary intakes of vitamin A5**

2

3

4 Torsten Bohn (1), Marta Despotovic (2), Farhad Vahid (1), and Ralph Rühl (3)

5

6

7 (1) Nutrition and Health Research Group, Department of Precision Health, Luxembourg Institute  
8 of Health, L-1445 Strassen, Luxembourg

9 (2) Institute for Medical Research, Department of Nutrition and Metabolism, Belgrade, Serbia

10 (3) CISCAREX UG, Berlin, Germany

11

12

13

14

15

16

17

18 **Correspondence:**

19 Dr. Ralph Rühl

20 CISCAREX UG

21 Transvaalstr. 27c

22 D-13351 Berlin

23 Email: [ralphruehl@ciscarex.com](mailto:ralphruehl@ciscarex.com)

**NOTE: This preprint reports new research that has not been certified by peer review and should not be used to guide clinical practice.**

24 **Abstract:**

25 A new vitamin concept, termed vitamin A5, was recently identified. Furthermore, dietary  
26 recommendations in the range of 1,1 (0,5 – 1,8) mg vitamin A5 / day were suggested by an  
27 international expert consortium. The ensuing question arises as to the current daily dietary intake  
28 amounts in the Western civilization. Addressing this answer included calculating the intake based on  
29 known amounts of vitamin A5 in frequently consumed food items of the human diet high in this  
30 vitamin as well as the known daily dietary intake amounts of those selected food components in  
31 Westernized countries. Regarding food items, amounts of vitamin A5 in the form of provitamin A5  
32 (i.e. 9-*cis*-beta-carotene (9CBC)), the predominant form in the diet, were found to range from 0,1 to  
33 39 µg 9CBC / g for individual fruits and vegetables, with highest concentrations in leafy vegetables.  
34 The average intake amounts of vitamin A5 in adults of the general population following a Western  
35 lifestyle in Europe, averaged 0,9 with a range of 0,5 (for Austria) – 1,3 (for Italy) mg 9CBC / day.  
36 Furthermore, based on our calculations, large parts, i.e. ~ 2/3rd of the population are low, even too  
37 low (<1.1 mg/day), in daily vitamin A5 intake. In addition to the importance of nudging the  
38 population towards a regrettably non-well accepted higher intake of fruits and vegetables, an  
39 additional fortification and supplementation of vitamin A5 could be considered, similar as to other  
40 micronutrients that are low a Westernized diet.

41

42

43

44

45 **Key-words:** Carotenoids, 9-*cis*-beta-carotene, dietary intake recommendations, fruit and vegetable

46 consumption, intake stratification, supplementation.

47 **Introduction:**

48 A new vitamin concept was recently proposed for vitamin A5, as the first novel identified vitamin for  
49 80 years [1] . The active form of this vitamin is formed out of its precursors, 9-*cis*-beta-carotene  
50 (9CBC), originating from plant derived food items [2], especially from fruits and vegetables, as well as  
51 out of 9-*cis*-13,14-dihydroretinol, originating from animal sources [3]. These two vitamin A5  
52 derivatives are the nutritional relevant precursors of 9-*cis*-13,14-dihydroretinoic acid, the molecule  
53 relevant for the endogenous activation of the nuclear hormone receptor, the retinoid X receptors  
54 (RXRs) [2].

55

56 Historically, it was only after clearly observable vitamin deficiencies were identified in humans that  
57 the underlying individual and health-relevant mechanism of action was identified [1]. Later on,  
58 further detailed dietary recommendations were finally suggested by national and international  
59 authorities, such as the USDA in the US [1] or EFSA for Europe [4]. Traditionally, vitamin intake  
60 recommendations were based on studies – human observational or even intervention studies or  
61 animal ones – that prevented typical, i.e. vitamin related deficiency symptoms [1, 5]. Today, after 80  
62 years since the discovery of the last vitamin [6], different strategies for the identification and  
63 establishment of potential novel vitamin concepts are more appropriate. Such a novel strategy is  
64 needed, mostly due to ethical restrictions for deprivation and supplemental dose-escalating studies  
65 of perceived important dietary constituents in humans [7] and regarding animal studies in sight of  
66 difficulties to transfer findings from animal models to humans, due to different metabolism and body  
67 weight [7, 8]. In addition, strategies performed around 100 years ago included randomly  
68 supplementing people with diseases in a non-ethical and non-standardized way and are not possibly  
69 anymore [9], and have been replaced by extremely work intensive and highly expensive standardized  
70 clinical procedures [10]. Targeted supplementation trials that exclude specific food components rich  
71 in a specific vitamin in a person's diets, such as performed earlier for vitamin B3 employing war  
72 prisoners [11], are for obvious reasons not ethically possible anymore.

73 Instead, today, a backwards strategy, starting i) from a unique mechanism of action involving the  
74 active vitamin form in blood / tissues and ii) relevant cellular concentrations related to normal  
75 physiological metabolism towards iii) considering nutritional precursors from food components and  
76 calculation of their daily intake amounts, also accounting for iv) aspects of their bioavailability, are a  
77 more feasible and logical strategy [12, 13].

78  
79 In summary, establishing a new vitamin category today requires different strategies and measures  
80 than a century ago, especially using state-of-the-art laboratory experiments for establishing a novel  
81 food-dependent mechanism of action with crucial health benefits.

82  
83 Regarding the large picture for vitamin A5, many of these puzzle pieces have been sorted out [1, 2],  
84 including its biological relevance as the ligand for the RXR nuclear receptor and the presence of  
85 precursor molecules in the diet. However, some crucial parts along the way of establishing intake  
86 recommendations can only be addressed following a logical step-by-step procedure connecting the  
87 various aspects of tissue concentrations, bioavailability and bioconversion aspects and occurrence in  
88 food items together [1].

89  
90 In this article, we add another important piece to the vitamin A5 story, based on a calculated daily  
91 intake of this vitamin in Westernized countries. Based on these estimations, the nutritional situation  
92 of these countries with respect to vitamin A5 supply can be evaluated and we can further stratify  
93 which subgroups regarding age, gender, or country, may be potentially low in their daily intake levels  
94 of this novel vitamin.

95 **Materials and methods:**

96

97 **Vitamin A5 / Provitamin A5 levels in food items**

98 First, we summarized, based on published studies and databases [14, 15], the vitamin A5 levels in the  
99 form of provitamin A5 (9CBC) in food items, focusing on fruits and vegetables as provitamin A5-rich  
100 sources that are also frequently consumed. For this purpose, a review of published peer-reviewed  
101 literature was conducted to identify relevant data on vitamin A5 levels in food items [1].

102

103 In addition to the EFSA food consumption database [15], one additional study that received  
104 particular attention was the EPIC cohort [14], as fruit and vegetable intake was available at relevant  
105 sub-categories, i.e. leafy vegetables, cabbages, root vegetables, fruiting vegetables, onions/garlic as  
106 well as other vegetables, which was not the case for the EFSA food consumption database [15]. We  
107 combined the averaged data of 9CBC concentrations in vegetable and fruit subgroups from Table 1A  
108 to calculate a weighted average of 0.2 µg 9CBC / g fruits and 5.2 µg 9CBC / g vegetables (Table 1B).

109

110 **Consumption of fruits and vegetables as well as their subgroups**

111 In a second step, we summarized, based on European food consumption data [15], the average  
112 amounts of these food items (i.e. fruits and vegetables) consumed by different populations in  
113 individual European countries. For this purpose, due to the large amount of available data and due to  
114 the standardized approach by which the data was obtained, we have focused largely on EFSA's food  
115 consumption database summarizing food consumption patterns across member states (displayed in  
116 Table 2) [16] and the EPIC cohort based database displayed in Table 3 [14].

117

118 The EFSA food consumption database provided detailed data on food intake patterns, including  
119 frequency and quantity of fruit and vegetable consumption, across various demographic groups (age  
120 and gender based). When several populations or studies were available for a European country, the

121 arithmetic mean per each study was first calculated. Thereafter, the average consumption per  
122 country level was calculated, which was then termed “mean of means”.

123

124 In addition to food intake data, information was also collected on fruit and vegetable intake  
125 recommendations per country, in order to compare estimated intakes with the respective countries’  
126 food based dietary guidelines.

127

### 128 **Calculation of provitamin A5 intake**

129 As a third step, Further we calculated the intake of 9CBC by means of the more detailed EPIC cohort  
130 data, by combining the average 9CBC contents from Table 1B with the food intake data from EPIC  
131 (Table 3) per country. Furthermore, we calculated, based on these estimations and the previous  
132 intake estimates the amount of provitamin A5 consumed per day based in each European nation  
133 (Figure 3 and 4).

134

### 135 **Statistical Analysis**

136 Descriptive statistics, including mean and standard deviation (SD), were computed to summarize the  
137 average daily intake levels of provitamin A5 across different population groups. Frequency  
138 distributions were also examined to identify patterns of vitamin A5 intake within each population.

139

140 **Results**

141

142 ***Concentration of vitamin A5 in the form of provitamin A5 in individual food items***

143 A limited number of publications exists reporting concentrations of vitamin A5 / 9CBC, expressed as  
144 provitamin A5, i.e. 9CBC, in fruits and vegetables (Table 1). The average concentration of 9CBC in  
145 fresh fruits was found to be 0.2 µg 9CBC / g fruits and the estimated concentration in vegetables was  
146 4.7 µg 9CBC / g vegetables, while a weighted average estimation, considering different intake  
147 amounts of individual vegetable subgroups, resulted in an average of 5.2 µg 9CBC / g vegetables,  
148 which was used for all further calculations.

149

150 When comparing different sub-groups of vegetables, the highest concentrations appeared to be  
151 present in leafy vegetables, followed by root vegetables and cabbages. It should be noted that fruit  
152 juices, for lack of data regarding 9CBC, were not included in this evaluation.

153

154 Data regarding vitamin A5 intake in the form of 9CDHROL and 9CDHROL-esters from animal based  
155 products were not reported, as there are currently no data available and concentrations have been  
156 reported to be very low [2].

157

158

159 ***Summary of current intake recommendations for fruits and vegetables***

160

161 ***Daily intake of fruit and vegetables in Europe***

162 **A. Based on the EFSA food consumption database**

163 Data from 24 countries, 23 based on EFSA's food consumption database, encompassing a total of  
164 26.600 participants aged 18-64 years were included in this investigation. As shown in figure 1 and  
165 table 2, fruit intake ranged from 91 g / day (Sweden and Ireland) to 287 g/day (Luxembourg) with an

166 average of 147 g / day. Vegetable intake was reported lowest in Austria (90 g / day) and highest in  
167 Italy (236 g / day) and an average of 164 g / day. This translates into a highest combined intake of  
168 fruits and vegetables with 503 g / day in Luxembourg, lowest in Sweden with 218 g / day and an  
169 average of 312 g / day.

170

171 Most countries did not even reach the minimum WHO recommended 400 g fruits and vegetables /  
172 day: According to EFSA's food consumption database, out of the 23 countries listed in table 2, with  
173 only Italy and Luxembourg reaching the recommended 400 g of fruits and vegetables / day (i.e. 5  
174 portions per day) target. Especially Southern European countries such as Spain, Greece, Portugal,  
175 Italy and Cyprus showed generally higher combined fruit and vegetable intakes compared to  
176 Northern European countries such as Ireland, Denmark, Sweden, or Finland.

177

## 178 **B. The EPIC cohort**

179 When comparing findings by EFSA to the EPIC cohort, in which data was generally also obtained by  
180 24 h recalls (though not by multiple ones), similar tendencies were found for fruit and vegetable  
181 intakes with a higher average of 417 g / day in comparison to 312 g / day in the EFSA database. The  
182 average vegetable intake in the EPIC database was 175 g / day and comparable to the 164 g / day in  
183 the EFSA database. The average fruit intake was 242 g / day in the EPIC cohort while the EFSA values  
184 were much lower with 147 g / day.

185

186 Highest intake of fruits / vegetables per capita (Table 3) were found comparable to the EFSA  
187 database in the Southern European Nations like Spain (573 g / day), followed by Italy (569 g / day)  
188 and Greece (496 g / day), while lowest once were mainly determined also comparable in Northern  
189 European countries like Sweden (262 g / day) and the Netherlands (313 g / day). With regard to the  
190 recommended 400 g of fruit and vegetables per day, only 4 out of 8 countries (Table 3 and Figure 1),  
191 for which data were available, for both men and women met this intake recommendation.



192

### 193 **Calculation of individual intake of vegetable subgroups**

194 Regarding vegetable subgroups as determined based on the EPIC cohort study, a total of 22 g leafy  
195 vegetables (men and women combined, out of 175 g total vegetables) were consumed, based on  
196 data from 8 countries reporting both data of men and women (Table 3).

197

198 Regarding fruits, an average of 242 g / day were consumed. Southern countries such as Italy, Spain  
199 and Greece showed consistently higher intakes for vegetables, including leafy ones and fruits  
200 compared to Northern European countries such as Denmark, the Netherlands, Germany and Sweden.  
201 An exception was noted for cabbages, which did not follow this trend, as high concentrations were  
202 consumed in the UK, Denmark and Germany. When looking at subgroups in man or woman, no  
203 remarkable overall differences were apparent for the intake of total vegetables, leafy vegetables, and  
204 individual subgroups (Figure 2).

205

### 206 ***Estimating the daily intake of provitamin A5***

207 Based on the EPIC cohort about half of the countries would fall below the earlier proposed 1.1 mg /  
208 day intake of provitamin A5 (Figure 2 and 3). Only the Southern European countries, due to their  
209 generally higher intake of fruits and vegetables (Tables 2-3 and Figure 2) were estimated to reach the  
210 1.1 mg / day target, while Northern and Central European countries had lower intakes as 0.5 mg /  
211 day. Employing data from EFASs Food Consumption database, and also assuming an approx. content  
212 of 9CBC of 0.2 µg / g for fruits and 5.2 µg / g for vegetables (based on Table 1B) based on this cruder  
213 estimate, only few countries like Italy, Hungary, Luxembourg and Serbia reached the 1.1 mg / day  
214 9CBC target while the majority of 19 countries did not reach the suggested 1,1 mg 9CBC intake / day.  
215 The European average was comparable with 0.9 mg 9CBC / day in the EPIC cohort and 0.9 mg 9CBC in  
216 the EFSA cohort (Figure 3).

217

218

219 Due to their high content of 9CBC combined with their relatively frequent consumption, leafy  
220 vegetables were the vegetable subgroup most largely contributing to total provitamin A5 intake  
221 (contributing to often >50% of total 9CBC intake), followed by root vegetables, cabbages and other  
222 vegetables (Figure 2). Fruits contributed, due to their low content of 9CBC, very little to overall  
223 intake, below 5% (Figure 2). Slight differences between men and women were noted, with women  
224 showing slightly lower average intakes of 9CBC.

225

226 When looking at 9CBC intake by age in the EFSA cohort (Figure 3C), the differences between the age  
227 groups appeared to be small, with the highest intakes in elderly adults aged 65-74 years. This is  
228 somewhat confirmed by EFSA data [15], as fruit and especially vegetable consumption is highest also  
229 for the elderly compared to adolescents and the elderly.

230

231 **Comparison of provitamin A5 intake in persons consuming low, medium and high amounts of fruits**  
232 **and vegetables (Figure 4)**

233 Based on data from a study just performed in France [17], the majority (>50%) consumed less than  
234 3.5 portions fruits and vegetables / day with an average of 2 portions, reach in consequence an  
235 average intake of only 0.6 mg provitamin A5 / day. Furthermore, only 21% of the French population  
236 consumed between 3,5 and 5 portions of fruits and vegetables per day, based on an average of 4,2  
237 portions of fruits and vegetables / day and consequently an estimated provitamin A5 intake of 1,3  
238 mg 9CBC / day [18]. Only 25 % of the French population consumed sufficient fruits and vegetables  
239 with 5 and more portions / day and an estimated provitamin A5 intake of 2,1 mg 9CBC / day [18, 19].  
240 In consequence, this means that ~64% (~2/3<sup>rd</sup>) of the French population consume too few fruits and  
241 vegetables per day and in consequence also a too low daily intake of provitamin A5.

242

243 **Discussion:**

244 In this article we present, for the first time, an estimation of vitamin A5 intake in various European  
245 countries. This compound has been identified and categorized as a novel vitamin and / or an  
246 independent subcategory of vitamin A and an intake estimate across various European populations  
247 was required. Toward this end, we calculated vitamin A5 intakes independently from vitamin A(1)  
248 from the background diet. An average intake of vitamin A5 in the adult population ranging from 0.5  
249 to 1.3 mg per day was found, with a tendency for higher intakes in Southern European countries. It  
250 was also estimated that approx. 2/3 of the population would consume less than the proposed  
251 recommended intake of 1.1 mg provitamin A5 / day.

252  
253 Comparable to other vitamins, we make use of available data from cohort studies, in our case from  
254 the EPIC [14] and EFSA cohorts [15], allowing to calculate the daily intake specified for several  
255 European countries, sex and partly age groups, which are currently available in these databases. As a  
256 first step, based on available data, we calculated the average intake of vitamin A5 in food categories  
257 that are rich in vitamin A5. Here we focused on fruits and vegetables, where provitamin A5, i.e. 9-*cis*-  
258  $\beta$ -carotene, is mainly present. The levels of 9-*cis*-13,14-dihydroretinol, as well as its esters in the  
259 human food matrix have thus far either not been determined or are deemed very low [3], suggesting  
260 that the main intake of vitamin A5 is via plant foods rich in provitamin A5 [20]. At first, an average  
261 provitamin A5 concentration was calculated, with 0.2  $\mu$ g provitamin A5 / day for fruits and 5.2  $\mu$ g  
262 provitamin A5 / day for vegetables, which were then employed for further calculations. This was  
263 required, as most databases do not contain further details on the consumption of individual fruits  
264 and vegetable subgroups.

265  
266 The highest daily intake amounts of fruits and vegetables was determined in Southern European  
267 countries such as Greece, Spain and Italy, and lowest in Northern European countries including  
268 Sweden, the Netherlands and Denmark. Remarkable is that the large majority of Europeans was

269 consuming less than the suggested “5 A DAY”-intake recommendations of 5 portions of each 80 g  
270 fruits and vegetables by national and international food organizations [14, 15, 21]. However, this has  
271 been remarked in earlier consumption surveys in Europe [14].

272

273 Regarding the best sources of provitamin A5 per weight, the main source of provitamin A5 intake  
274 originates from the vegetable sub-group leafy vegetables, with 20.3  $\mu\text{g}$  provitamin A5 / g food matrix,  
275 followed by cabbages (6.4  $\mu\text{g}/\text{g}$ ) and root vegetables (6.4  $\mu\text{g}/\text{g}$ ), with low concentrations in fruiting  
276 vegetables (1.0  $\mu\text{g}/\text{g}$ ) and onions / garlic (0.1  $\mu\text{g}/\text{g}$ ). The European country-specific daily intake  
277 amount of these leafy vegetables was highest in Southern European countries such as Greece, Spain  
278 and Italy and lowest in Northern / Central European countries including UK, Norway, Denmark and  
279 Sweden. This is in line with studies reporting higher fruit and vegetable intake in general in Southern  
280 European countries [14].

281

282 Based on the fruit and vegetable intake amounts from the EPIC and the EFSA database [14, 15],  
283 summarizing 65,544 individuals, we calculated for 27 European countries country specific daily  
284 vitamin A5 intake amounts with an average of 0.9 mg provitamin A5 / day, which is lower than the  
285 previously suggested recommendation of 1.1 mg provitamin A5 / day, calculated by two independent  
286 methods [1]. These estimated average intake amounts of provitamin A5 on average of European  
287 countries sound moderate / fair compared to the suggested intake amounts. While when stratifying  
288 for different countries, we observed that the average in the non-Southern European countries such  
289 as especially Austria (0.5 mg/day), Germany (0.5 mg/day), Czech Republic (0.6 mg/day), Sweden (0.7  
290 mg/day EFSA data / 0.6 mg/day EPIC data) were clearly below the suggested intake amounts of 1.1  
291 mg provitamin A5 / day. Based on the estimations of daily provitamin A5 intake from the 27  
292 European countries, only 4 out of 24 countries for the EFSA database calculations and 3 out of 8 from  
293 the EPIC database calculations reach sufficient high daily provitamin A5 intake levels on average,  
294 while the large majority of the European countries 3 (based on the EPIC database) and 8 (based on

295 the EFSA database) being even below 0.8 mg provitamin A5 / day on average and thereby far below  
296 the suggested daily intake amounts of provitamin A5. This means that the large majority of European  
297 countries on average have a too low daily intake of daily vitamin A5. However, it also needs to be  
298 specified that both the intake recommendation as well as the calculated intake are based on average  
299 values for adults, and due to the limited amount of data available. Further studies should aim to  
300 determine detailed estimations such as allowing estimating an intake that would cover over 97% of  
301 the population's need, such as necessary to determine the population reference intake (PRI).

302

303 Further based on evaluations in France [17] it was calculated that 54% of the French population eat  
304 less than 3.5 daily portions of fruits and vegetables and a further considerable fraction (21 %)   
305 consume between 3.5 – 5 portions, which means that ca. 64% of the French population are below  
306 the suggested "5 A DAY" recommendations. This means as a consequence that ~2/3 of the French  
307 population, as well as transferable to many other European populations are below the suggested  
308 daily intake levels of vitamin A5 which were based on the "5 A DAY"-concept.

309

310 In summary, due to the low intake of fruits and vegetables [22], especially vegetables [14] and with  
311 special focus on low intake of leafy vegetables [14], there is an estimated low, even too low, daily  
312 dietary intake of vitamin A5 present in Europeans. This data is likely relevant for other rather  
313 Western-lifestyle based societies following western based dietary patterns, which includes large  
314 populations in many developing countries [1, 23]. We recommend, based on these calculated  
315 parameters that, in order to improve dietary patterns and assure also sufficient intake of vitamin A5  
316 that a) novel dietary recommendations should focus mainly on a higher daily dietary intake of  
317 vegetables and especially leafy vegetables and b) consider additional food fortification with vitamin  
318 A5 and / or dietary supplements to meet the suggested daily dietary intake recommendations for  
319 vitamin A5 to avoid a potential vitamin A5 deficiency [20].

320

321 Whether a low daily intake of vitamin A5 is associated with mental problems, which are prevalent in  
322 our Western hemisphere [20] is currently merely predicted and requires further attention based on  
323 European-wide epidemiological databases with sufficient details for specific European countries  
324 regarding dietary intake and mental health issues. Not surprisingly, in Southern European countries  
325 like Greece, Italy and Croatia with a high average estimated vitamin A5 intakes, the mental problems  
326 appear to have a lower prevalence, while in Northern European countries like the Netherlands,  
327 Finland, Denmark, Sweden and Germany these mental problems are reported to have a high  
328 prevalence [24]. A direct correlation and causal connection must still be elaborated and evaluated in  
329 larger databases, together with deeper functional mechanistic evaluations. Furthermore, described  
330 and suggested long-term or medium-term vitamin A5-deficiencies such as poor mental health and  
331 high incidence of numerous neurological diseases should be evaluated with respect to nutritional or  
332 functional vitamin A5-signalling pathways [20]. While poor mental health is described to be based on  
333 low daily intake of fruits and vegetables, especially vegetables [25] and with a special focus on leafy  
334 vegetables [26]. A detailed clinical mechanistic step-by-step approach how fruits and vegetables,  
335 with a focus on vegetables and leafy vegetables rich in vitamin A5, transmit their health-promoting  
336 and –protecting activity, via the retinoid X receptor, was summarized in a recent article [1], which is  
337 based on dozens of mechanistic studies performed using laboratory models as a base.

338

339 In this study, a more detailed and data-based intake of vitamin A5 in several European countries was  
340 attempted and results were compared against a first recommendation for vitamin A5 intake. The  
341 calculated data were evaluated in an ideal case dietary scenario as well as in a reality-based scenario  
342 [1], showing that large parts of the European society may be too low in daily intake of vitamin A5.

343

#### 344 **Author contributions**

345 RR was responsible for the idea and outline and writing of the article, FV did export and calculate  
346 food consumption data, TB was involved in writing the article and critically reviewing the concept.

347

348 **Conflict of interest**

349 RR is CEO and shareholder of CISCAREX UG.

350

351

352

353 **Table 1:** Concentration of 9CBC in µg 9CBC/g food matrix

| - A -                                       | 9CBC<br>dry weight in µg/g | 9CBC<br>fresh weight in µg/g |
|---------------------------------------------|----------------------------|------------------------------|
| <b>food item</b>                            |                            |                              |
| <b>fruits</b>                               |                            |                              |
| apricot                                     | 4.4                        | 0.6                          |
| banana                                      | 0.3                        | 0.1                          |
| cherry                                      | -                          | -                            |
| date                                        | -                          | -                            |
| grape                                       | -                          | -                            |
| guava                                       | -                          | -                            |
| mango                                       | -                          | -                            |
| nectarine                                   | -                          | -                            |
| papaya                                      | 7.0                        | 1.3                          |
| peach                                       | -                          | -                            |
| pear                                        | -                          | -                            |
| prune                                       | -                          | -                            |
| peach                                       | -                          | 0.3                          |
| <b>average of all fruits</b>                | <b>0.9</b>                 | <b>0.2</b>                   |
| <b>vegetables</b>                           |                            |                              |
| lettuce #                                   | 41                         | 2.0                          |
| spinach #                                   |                            | 38.6                         |
| cabbage ##                                  | -                          | -                            |
| kale ##                                     |                            | 14.1                         |
| broccoli ##                                 |                            | 5.0                          |
| carrot §                                    | 57.1                       | 6.5                          |
| cucumber §§                                 | -                          | -                            |
| eggplant §§                                 | -                          | -                            |
| pumpkin (1) §§                              | 2.7                        | 0.2                          |
| tomato (1) §§                               | -                          | -                            |
| zucchini §§                                 | -                          | -                            |
| pumkin (2) §§                               |                            | 2.5                          |
| tomato (2) §§                               |                            | 4.8                          |
| pepper (red) §§                             | 6.0                        | 0.6                          |
| pepper (red hot) §§                         | 9.6                        | 1.0                          |
| onion (green) \$                            | -                          | -                            |
| parsley \$\$                                | 111.2                      | 11.6                         |
| dill \$\$                                   | 27.7                       | 4.3                          |
| potato \$\$                                 |                            | -                            |
| sweet potato 1 \$\$                         | 65.1                       | 10.2                         |
| sweet corn \$\$                             | -                          | -                            |
| sweet potato 2 \$\$                         |                            | 1.5                          |
| <b>average of all vegetables</b>            | <b>20.1</b>                | <b>4.7</b>                   |
| <b>- B -</b>                                |                            |                              |
| <b># - average for leafy vegetables</b>     |                            | 20.3                         |
| <b>## - average for cabbages</b>            |                            | 6.4                          |
| <b>§ - average for root vegetables</b>      |                            | 6.5                          |
| <b>§§ - average for fruiting vegetables</b> |                            | 1.0                          |
| <b>\$ - average for onions / garlic</b>     |                            | 0.1                          |
| <b>\$\$ - average for other vegetables</b>  |                            | 4.6                          |
| <b>adjusted average of all vegetables</b>   |                            | <b>5.2 *</b>                 |

354 Some data were not measured indicated by a “blank”, some data were under the quantification limit and indicated by a “-” which was set  
355 with 0.05 as half of the quantification limit for further calculation, \* - this calculation is based on the listed distribution of different  
356 vegetable sub-groups given in the EPIC cohort study [14] with a calculated 13% leafy vegetables, 12% cabbages, 13% root vegetables, 42 %  
357 fruiting vegetables, 7% onion / garlic and 14% other vegetables. Numbers 1 [27] and 2 [28] indicate different levels of 9CBC based on  
358 different studies.



359 **Table 2:** Fruits (F) and vegetables (V) intake (g per day) from the EFSA database of different European  
360 countries<sup>†</sup>.

| Countries                     | Fruits          | Vegetables      | F + V           | % V           | Measurement method and Survey name                                                                          | Sample size  | Year |
|-------------------------------|-----------------|-----------------|-----------------|---------------|-------------------------------------------------------------------------------------------------------------|--------------|------|
| Italy                         | 171 ± 143       | 236 ± 155       | 407             | 58            | Italian national dietary survey on the adult population from 10 up to 74 years old                          | 726          | 2018 |
| Hungary                       | 138 ± 139       | 235 ± 166       | 373             | 63            | Hungarian national food consumption survey                                                                  | 529          | 2018 |
| Serbia                        | 137 ± 164       | 217 ± 165       | 354             | 62            | Serbian Food Consumption Survey on adults                                                                   | 1150         | 2019 |
| Luxembourg*                   | 287 ± 268       | 216 ± 172       | 503             | 43            | ORISCAV-LUX 2 [29]                                                                                          | 1326         | 2017 |
| Latvia                        | 141 ± 170       | 203 ± 133       | 345             | 59            | Latvian National Dietary Survey                                                                             | 1080         | 2012 |
| Cyprus                        | 111 ± 135       | 201 ± 145       | 312             | 65            | National dietary survey of the adult population of Cyprus                                                   | 272          | 2014 |
| Greece                        | 121 ± 164       | 192 ± 143       | 313             | 61            | The EFSA-funded collection of dietary and related data in the general population aged 10-74 years in Greece | 260          | 2014 |
| Portugal                      | 161 ± 140       | 182 ± 130       | 343             | 53            | National Food, Nutrition, and Physical Activity Survey of the Portuguese general population                 | 3102         | 2015 |
| Croatia                       | 136 ± 153       | 174 ± 158       | 310             | 56            | Croatian food consumption survey on adults                                                                  | 2002         | 2011 |
| Estonia                       | 226 ± 231       | 168 ± 159       | 394             | 43            | National Dietary Survey among 11-74 years old individuals in Estonia                                        | 2124         | 2013 |
| Montenegro                    | 120 ± 110       | 163 ± 121       | 326             | 50            | Montenegrin National Dietary Survey on the general population                                               | 697          | 2017 |
| Netherlands                   | 115 ± 128       | 163 ± 117       | 279             | 59            | Dutch National Food Consumption Survey 2012-2016 (DNFCS)                                                    | 1487         | 2012 |
| Romania                       | 163 ± 186       | 154 ± 110       | 317             | 49            | Romanian national food consumption survey for adolescents, adults, and elderly                              | 740          | 2019 |
| Slovenia                      | 158 ± 151       | 153 ± 105       | 311             | 50            | Slovenian national food consumption survey                                                                  | 385          | 2017 |
| Ireland                       | 91 ± 95         | 151 ± 84        | 242             | 62            | North/South Ireland Food Consumption Survey                                                                 | 958          | 1997 |
| Bosnia and Herzegovina        | 130 ± 144       | 149 ± 122       | 279             | 53            | Bosnia-Herzegovinian Dietary Survey of adolescents, adults, and pregnant women                              | 850          | 2017 |
| Spain                         | 155 ± 129       | 144 ± 102       | 299             | 48            | Spanish National dietary survey in adults, elderly, and pregnant women                                      | 536          | 2013 |
| France                        | 133 ± 131       | 144 ± 90        | 277             | 52            | Individual and national study on food consumption 2                                                         | 2276         | 2007 |
| Finland                       | 171 ± 178       | 126 ± 102       | 297             | 43            | National Findiet Surveys                                                                                    | 1575         | 2007 |
| Sweden                        | 91 ± 104        | 126 ± 99        | 218             | 59            | National Diet and Nutrition Survey - Years 1-3                                                              | 1266         | 2008 |
| Belgium                       | 118 ± 122       | 125 ± 100       | 244             | 52            | Diet National 2004                                                                                          | 1292         | 2004 |
| Czech Republic                | 124 ± 123       | 117 ± 91        | 241             | 49            | Czech National Food Consumption Survey                                                                      | 1666         | 2003 |
| Germany                       | 165 ± 175       | 95 ± 94         | 260             | 37            | National Nutrition Survey II                                                                                | 10,419       | 2007 |
| Austria                       | 162 ± 153       | 90 ± 96         | 252             | 36            | Austrian Study on Nutritional Status 2010-12 - Adults                                                       | 308          | 2010 |
| <b>European average ± STD</b> | <b>147 ± 42</b> | <b>164 ± 41</b> | <b>312 ± 64</b> | <b>53 ± 8</b> | <b>Calculated sum of the 24 listed surveys</b>                                                              | <b>37026</b> |      |

361 Countries were sorted from top to bottom, based on the average vegetable intake.

362 † European Food consumption data [16]). Age range from 18-64 years.

363 \* median and interquartile range

364

365 **Table 3:** Summarised data from the EPIC cohort based on the data from the year 2002 [14].

366

| men                  |              | fruits (F) | vegetables (V) | F + V      | leafy V   | % V / F+V | % LV / V  |
|----------------------|--------------|------------|----------------|------------|-----------|-----------|-----------|
| Country              | n            | mean       | mean           |            | mean      |           |           |
| Greece               | 1312         | 273        | 270            | 543        | 30        | 50        | 11        |
| Spain                | 1777         | 372        | 224            | 596        | 44        | 38        | 19        |
| Italy                | 1444         | 403        | 211            | 614        | 35        | 34        | 17        |
| Germany              | 2268         | 207        | 160            | 368        | 14        | 44        | 9         |
| Netherlands          | 1024         | 168        | 137            | 305        | 28        | 45        | 20        |
| UK *                 | 518          | 206        | 193            | 400        | 10        | 48        | 5         |
| Denmark              | 1923         | 160        | 141            | 301        | 10        | 47        | 7         |
| Sweden               | 2765         | 122        | 112            | 234        | 9         | 48        | 8         |
| <b>sum # / av ##</b> | <b>13031</b> | <b>239</b> | <b>181</b>     | <b>420</b> | <b>23</b> | <b>44</b> | <b>12</b> |
| STD                  |              | 102        | 53             | 146        | 13        | 5         | 6         |
| women                |              | fruits (F) | vegetables (V) | F + V      | leafy V   | % V / F+V | % LV / V  |
| Country              | n            | mean       | mean           |            | mean      |           |           |
| Greece               | 1374         | 242        | 207            | 449        | 29        | 46        | 14        |
| Spain                | 1443         | 355        | 196            | 551        | 34        | 36        | 17        |
| Italy                | 2512         | 343        | 181            | 524        | 28        | 34        | 16        |
| Germany              | 2150         | 236        | 166            | 403        | 17        | 41        | 10        |
| Netherlands          | 2960         | 192        | 130            | 322        | 23        | 40        | 18        |
| UK *                 | 768          | 223        | 192            | 415        | 15        | 46        | 8         |
| Denmark              | 1995         | 206        | 150            | 356        | 11        | 42        | 7         |
| Sweden               | 3285         | 164        | 127            | 290        | 11        | 44        | 9         |
| France **            | 4639         | 251        | 226            | 476        | 45        | 47        | 20        |
| Norway **            | 1798         | 168        | 125            | 293        | 7         | 43        | 5         |
| <b>sum # / av ##</b> | <b>22924</b> | <b>238</b> | <b>170</b>     | <b>408</b> | <b>22</b> | <b>42</b> | <b>12</b> |
| STD                  |              | 66         | 36             | 93         | 12        | 4         | 5         |
| women and men        |              | fruits (F) | vegetables (V) | F + V      | leafy V   | % V / F+V | % LV / V  |
| Country              | n            | mean       | mean           |            | mean      |           |           |
| Greece               | 2686         | 257        | 238            | 496        | 29        | 48        | 12        |
| Spain                | 3220         | 363        | 210            | 573        | 39        | 37        | 18        |
| Italy                | 3956         | 373        | 196            | 569        | 32        | 34        | 16        |
| UK *                 | 1286         | 215        | 193            | 407        | 13        | 47        | 6         |
| Germany              | 4418         | 222        | 163            | 385        | 15        | 42        | 9         |
| Denmark              | 3918         | 183        | 145            | 328        | 10        | 44        | 7         |
| Netherlands          | 3984         | 180        | 133            | 313        | 25        | 43        | 19        |
| Sweden               | 6050         | 143        | 119            | 262        | 10        | 46        | 8         |
| <b>sum # / av ##</b> | <b>29518</b> | <b>242</b> | <b>175</b>     | <b>417</b> | <b>22</b> | <b>43</b> | <b>12</b> |
| STD                  |              | 85         | 41             | 118        | 11        | 5         | 5         |

367

368 The countries are sorted from top to bottom, based on the vegetable intake of women and men, n –  
 369 number of included persons, av – average, \* just health aware people were included, \*\* just woman  
 370 were examined for this country, # - the sum is relevant for the number (n) of included persons, ## -  
 371 average of fruits intake, vegetable intake, F + V intake, leafy V intake, % V / F+V and % LV / V.

372 **Figures:**

373

374 **Figure 1:** Schematic summary of a dietary pattern focusing on fruit and vegetable intakes in different  
375 European countries. *The dashed line indicates the recommended "5 A DAY" recommendation of 5*  
376 *portions of 80 g fruits and / or vegetables for daily intake.*

377

378 **Figure 2:** Schematic summary of the calculated vitamin A5 intake levels in different European  
379 countries. Used abbreviations; V - vegetables

380

381 **Figure 3:** Calculated individual daily 9CBC intake levels based from the data of the a) the EPIC cohort  
382 [14], b) summarized national surveys and c) age depending intake, both based on EFSA's Food  
383 Consumption database [16] : All estimated values are based on average values for 9CBC in fruits (0.2  
384  $\mu\text{g/g}$ ) and vegetables (5.2  $\mu\text{g/g}$ ). *The dashed line indicates the recommended intake of 1.1 mg 9CBC*  
385 *(provitamin A5) /day [1].*

386

387 **Figure 4:** Calculated daily 9CBC intake levels of individuals with low, medium and high daily average  
388 fruit and vegetable intake from a French survey [14] with an average F+V intake of 295 g F+V / day.  
389 *The dashed line indicates the recommended intake of 1.1 mg 9CBC (provitamin A5) /day [1].*

390

391

392 **Figure 1:**

393

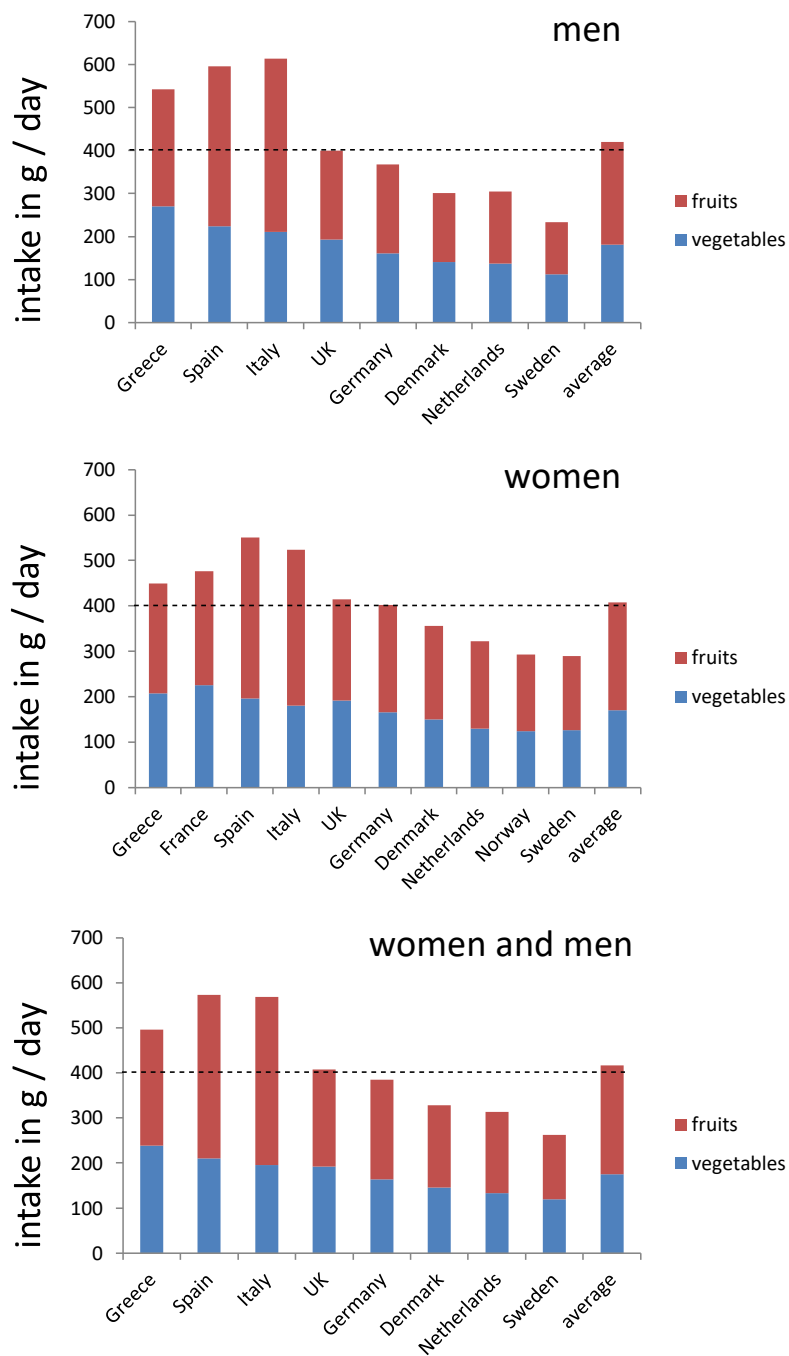

394

395 **Figure 2:**

396

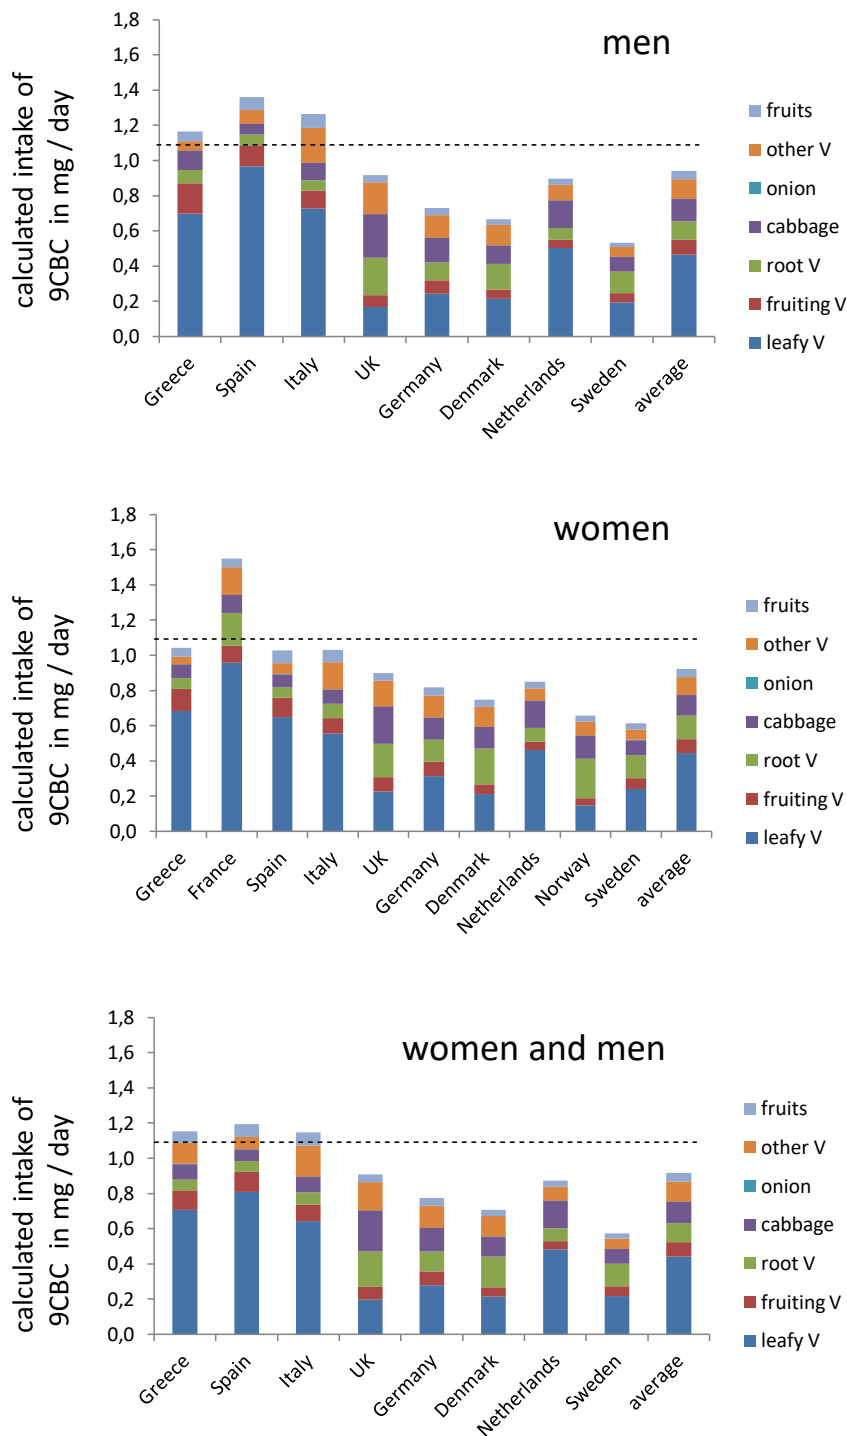

397

398

399 **Figure 3:**

A. EPIC cohort database

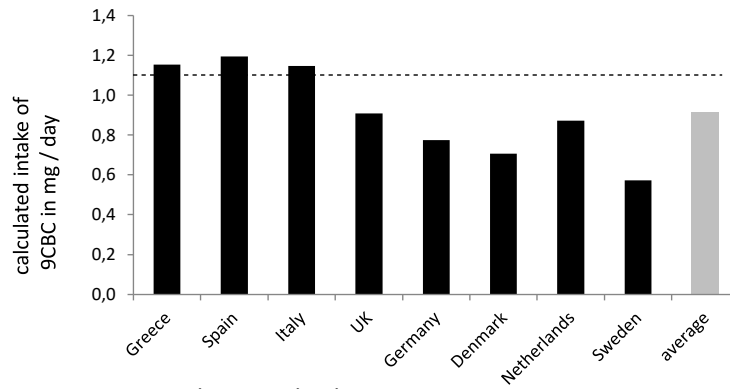

B. EFSA - national survey database

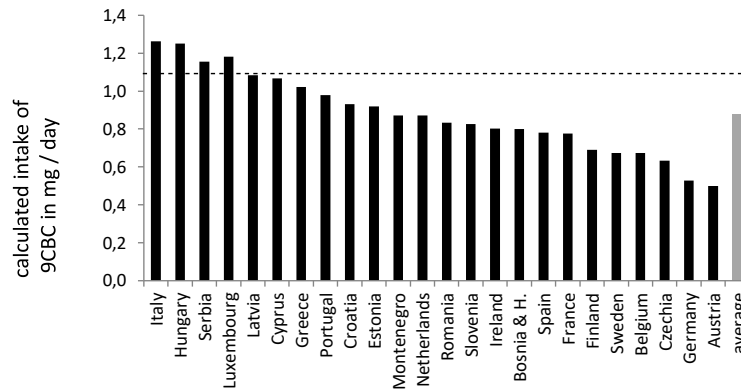

C. Comparison age

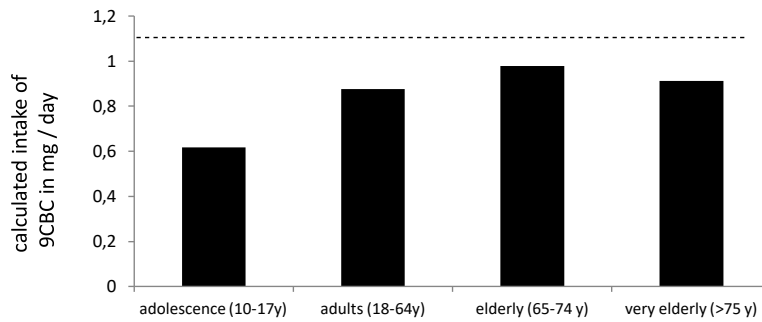

400

401

402 **Figure 4:**

403

Comparison for low, medium and high intake of fruits and vegetables

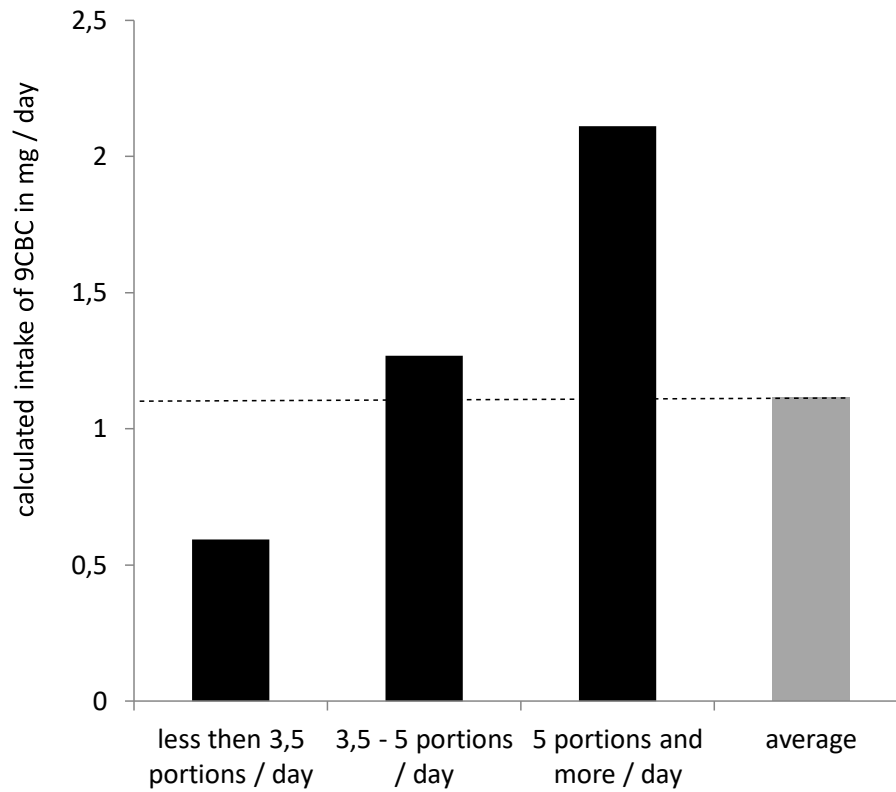

|                                         |    |     |     |     |
|-----------------------------------------|----|-----|-----|-----|
| average intake of F+V portions per day  | 2  | 4,2 | 6,9 | 3,7 |
| representing % of the French population | 54 | 21  | 25  |     |

404

405 **References:**

406

- 407 [1]. Bohn T, Hellmann-Regen J, de Lera Á R, Böhm V, Rühl R. Human nutritional relevance and  
408 suggested nutritional guidelines for Vitamin A5/X and Provitamin A5/X. submitted to Nutrition  
409 Reviews. 2022.
- 410 [2]. Krężel W, Rivas A, Szklenar M, Ciancia M, Alvarez R, de Lera AR, Rühl R. Vitamin A5/X, a new  
411 food to lipid hormone concept for a nutritional ligand to control RXR-mediated signaling. *Nutrients*.  
412 2021; 13(3): 925.
- 413 [3]. Rühl R, Krężel W, de Lera AR. 9-Cis-13, 14-dihydroretinoic acid, a new endogenous  
414 mammalian ligand of retinoid X receptor and the active ligand of a potential new vitamin A category:  
415 vitamin A5. *Nutrition reviews*. 2018; 76(12): 929-41.
- 416 [4]. Additives EPoF, Nutrient Sources added to F. Scientific Opinion on the re-evaluation of mixed  
417 carotenes (E 160a (i)) and beta-carotene (E 160a (ii)) as a food additive. *EFSA Journal*. 2012; 10(3):  
418 2593.
- 419 [5]. Organization WH. Vitamin and mineral requirements in human nutrition: World Health  
420 Organization; 2004.
- 421 [6]. Scott JM, Molloy AM. The discovery of vitamin B(12). *Ann Nutr Metab*. 2012; 61(3): 239-45.
- 422 [7]. van der Worp HB, Howells DW, Sena ES, Porritt MJ, Rewell S, O'Collins V, Macleod MR. Can  
423 animal models of disease reliably inform human studies? *PLoS Med*. 2010; 7(3): e1000245.
- 424 [8]. Rucker RB, Rucker MR. Nutrition: ethical issues and challenges. *Nutr Res*. 2016; 36(11): 1183-  
425 92.
- 426 [9]. Semba RD. The discovery of the vitamins. *Int J Vitam Nutr Res*. 2012; 82(5): 310-5.
- 427 [10]. Hardman TC, Aitchison R, Scaife R, Edwards J, Slater G. The future of clinical trials and drug  
428 development: 2050. *Drugs Context*. 2023; 12.
- 429 [11]. Roe DA. A plague of corn. The social history of pellagra. 1973.
- 430 [12]. van Het Hof KH, West CE, Weststrate JA, Hautvast JG. Dietary factors that affect the  
431 bioavailability of carotenoids. *J Nutr*. 2000; 130(3): 503-6.
- 432 [13]. Cifuentes M, Vahid F, Devaux Y, Bohn T. Biomarkers of food intake and their relevance to  
433 metabolic syndrome. *Food & Function*. 2024.
- 434 [14]. Agudo A, Slimani N, Ocke M, Naska A, Miller A, Kroke A, et al. Consumption of vegetables,  
435 fruit and other plant foods in the European Prospective Investigation into Cancer and Nutrition (EPIC)  
436 cohorts from 10 European countries. *Public health nutrition*. 2002; 5(6b): 1179-96.
- 437 [15]. EFSA. The EFSA Comprehensive European Food Consumption Database. EFSA; 2022.
- 438 [16]. EFSA. EFSA Food Consumption Database. [https://www.efsa.europa.eu/en/data-report/food-  
439 consumption-data](https://www.efsa.europa.eu/en/data-report/food-consumption-data). 2022; accessed 27.02.2024.
- 440 [17]. Tavoularis G, Hébel P. Fruits et légumes : les Français suivent de moins en moins la  
441 recommandation. *Credoc - Consommation et modes de vie*. 2017; 292.
- 442 [18]. Castetbon K, Vernay M, Malon A, Salanave B, Deschamps V, Roudier C, et al. Dietary intake,  
443 physical activity and nutritional status in adults: the French nutrition and health survey (ENNS, 2006–  
444 2007). *British Journal of Nutrition*. 2009; 102(5): 733-43.
- 445 [19]. Francou A, Hebel P, Braesco V, Drewnowski A. Consumption Patterns of Fruit and Vegetable  
446 Juices and Dietary Nutrient Density among French Children and Adults. *Nutrients*. 2015; 7(8): 6073-  
447 87.
- 448 [20]. Bánáti D, Hellman-Regen J, Mack I, Young HA, Benton D, Eggersdorfer M, et al. Defining a  
449 vitamin A5/X specific deficiency - vitamin A5/X as a critical dietary factor for mental health. *Int J  
450 Vitam Nutr Res*. 2024; 94(5-6): 443-75.
- 451 [21]. Stea TH, Nordheim O, Bere E, Stornes P, Eikemo TA. Fruit and vegetable consumption in  
452 Europe according to gender, educational attainment and regional affiliation-A cross-sectional study  
453 in 21 European countries. *PLoS One*. 2020; 15(5): e0232521.



- 454 [22]. Stea TH, Nordheim O, Bere E, Stornes P, Eikemo TA. Fruit and vegetable consumption in  
455 Europe according to gender, educational attainment and regional affiliation—A cross-sectional study  
456 in 21 European countries. *Plos one*. 2020; 15(5): e0232521.
- 457 [23]. da Costa GG, da Conceição Nepomuceno G, da Silva Pereira A, Simões BFT. Worldwide  
458 dietary patterns and their association with socioeconomic data: an ecological exploratory study.  
459 *Global Health*. 2022; 18(1): 31.
- 460 [24]. OECD/European Union. *Health at a Glance: Europe 2022: State of Health in the EU Cycle*.  
461 Paris: OECD Publishing; 2022.
- 462 [25]. Głąbska D, Guzek D, Groele B, Gutkowska K. Fruit and Vegetable Intake and Mental Health in  
463 Adults: A Systematic Review. *Nutrients*. 2020; 12(1).
- 464 [26]. Morris MC, Wang Y, Barnes LL, Bennett DA, Dawson-Hughes B, Booth SL. Nutrients and  
465 bioactives in green leafy vegetables and cognitive decline: Prospective study. *Neurology*. 2018; 90(3):  
466 e214-e22.
- 467 [27]. Ben-Amotz A, Fishier R. Analysis of carotenoids with emphasis on 9-cis  $\beta$ -carotene in  
468 vegetables and fruits commonly consumed in Israel. *Food Chem*. 1998; 62(4): 515-20.
- 469 [28]. Khoo H-E, Prasad KN, Kong K-W, Jiang Y, Ismail A. Carotenoids and Their Isomers: Color  
470 Pigments in Fruits and Vegetables. *Molecules* [Internet]. 2011; 16(2):[1710-38 pp.].
- 471 [29]. Vahid F, Brito A, Le Coroller G, Vaillant M, Samouda H, Bohn T, Group oboOW. Dietary Intake  
472 of Adult Residents in Luxembourg Taking Part in Two Cross-Sectional Studies—ORISCAV-LUX (2007–  
473 2008) and ORISCAV-LUX 2 (2016–2017). *Nutrients*. 2021; 13(12): 4382.
- 474
